# Supplementary material for: Myogenic vasoconstriction requires G12/G13 and LARG to maintain local and systemic vascular resistance
Source: eLife. 2019 Sep 24;8:e49374. doi: 10.7554/eLife.49374 (PMC6777979; doi:10.7554/eLife.49374)
Supplement: Figure 1—source data 1. [file elife-49374-fig1-data1.xlsx]

## Sheet: Sheet1
Source data for figure 1A
	Pressure (mmHg)	Myogenic tone (% PDA) in Control (n=7)							Myogenic tone (% PDA) in SMC-Gq11-KO (n=7)
	10	0	0	0	0	1.37931	-2.18579	-1.57895	-1.96078	0	0	0	0	-1.48515	-1.48515
	20	4.81928	3.3	-7.2	-1.1	5.80645	-6.03015	-3.46535	-1.21951	4.81928	4.81928	-4.3	0.4	-6.52174	-3.06087
	40	6.63265	1.1	-6.1	5.9	4.63917	-3.18725	0	-1.53061	6.63265	6.63265	-1	6.7	-2.86738	1.91631
	60	13.5371	1.6	-6	2.8	14.2857	13.7255	1.37457	3.8961	13.5371	23.5371	8	5	1.6129	3.30645
	80	23.1707	5.3	16.5	1.8	32.7586	26.3598	5.49828	15.6929	20.1707	24.1707	11.3	14.5	19.1882	16.8441
	100	28.1746	18.7	21.4	8.6	42.5926	35.8407	23.9044	23.449	28.1746	28.1746	19.5	15.5	30.2789	22.8894
	120	30.9804	22.7	19.9	16	47.1698	38.1166	29.6296	28.4032	30.9804	32.9804	21.1	22.3	38.4937	30.3969
	140	31.5175	23.6	16.8	21.3	46.875	42.0091	28.629	32.1125	31.5175	31.5175	7.6	24.7	41.7021	33.2011
		Two-way ANOVA
		Source of Variation	% of total variation	P value
		Interaction	0.31	0.9936
		Column Factor	0.01	0.8356
		Row Factor	73	< 0,0001
		Source of Variation	P value summary	Significant?
		Interaction	ns	No
		Column Factor	ns	No
		Row Factor	****	Yes
		Source of Variation	Df	Sum-of-squares	Mean square	F
		Interaction	7	65	9.286	0.1501
		Column Factor	1	2.68	2.68	0.0433
		Row Factor	7	15365	2195	35.47
		Residual	88	5446	61.88
		Number of missing values	24
		Bonferroni multiple comparisons	Number of comparisons: 8
		Control vs Sm-Gq11-KO
		Row Factor	Control	Sm-Gq11-KO	Difference	95% CI of diff,
		10.00	-0.3408	-0.5743	-0.2335	-12,50 to 12,03
		20.00	-0.5528	-0.3338	0.219	-12,04 to 12,48
		40.00	1.284	2.428	1.144	-11,12 to 13,41
		60.00	5.903	9.264	3.361	-8,901 to 15,62
		80.00	15.91	17.5	1.591	-10,67 to 13,85
		100.0	25.6	24.18	-1.422	-13,68 to 10,84
		120.0	29.21	29.04	-0.1708	-12,43 to 12,09
		140.0	30.1	28.19	-1.913	-14,17 to 10,35
		Row Factor	Difference	t	P value	Summary
		10.00	-0.2335	0.05336	P > 0,05	ns
		20.00	0.219	0.05005	P > 0,05	ns
		40.00	1.144	0.2615	P > 0,05	ns
		60.00	3.361	0.7679	P > 0,05	ns
		80.00	1.591	0.3636	P > 0,05	ns
		100.0	-1.422	0.325	P > 0,05	ns
		120.0	-0.1708	0.03903	P > 0,05	ns
		140.0	-1.913	0.437	P > 0,05	ns
Source data for figure 1B
	Pressure (mmHg)	Myogenic tone (% PDA) in Control (n=7)							Myogenic tone (% PDA) in Sm-12/13-KO (n=8)
	10	-4.51977	0	-1.75439	-1.96078	0	-0.877195	0	1.92308	0	0	-1.82927	0	0	0	0
	20	-1.6129	4.81928	2.80899	-1.21951	-1.1	3.81413	3.3	0	0	0	-3.9548	0.4	-10.6	1.4	1.3
	40	0	6.63265	1.36986	-1.53061	5.9	4.00126	1.1008	11.2903	0	0	-4.40529	1.2	-1	2.3	1.7
	60	0.387597	13.5371	1.99203	3.8961	2.8	7.76458	1.6112	1.5625	-2.35294	0	-1.52672	1.4	-1.9	1.6	2.2
	80	15.3192	23.1707	13.617	13.6929	1.8	18.3939	5.3454	0.380228	-1.49813	0.359712	-0.3663	1.7	0.5	1.2	2.1
	100	23.8739	28.1746	30	22.449	8.6	29.0873	18.7567	0.743494	-0.73529	0.704225	0.359712	6.4	2.3	3.4	1.9
	120	29.7674	30.9804	37.1287	25.4032	16	34.0545	22.7835	6.66667	9.12409	0	5.67376	5	0.7	3.4	2.1
	140	30.9859	31.5175	36.1386	28.1124	21.3	33.8281	23.6456	3.63636	12.9964	0.344828	5.28169	5	1.1	7.5	1.5
		Two-way ANOVA
		Source of Variation	% of total variation	P value
		Interaction	22.2	< 0,0001
		Column Factor	22.5	< 0,0001
		Row Factor	44.38	< 0,0001
		Source of Variation	P value summary	Significant?
		Interaction	****	Yes
		Column Factor	****	Yes
		Row Factor	****	Yes
		Source of Variation	Df	Sum-of-squares	Mean square	F
		Interaction	7	2829	404.2	20.06
		Column Factor	1	2868	2868	142.3
		Row Factor	7	5655	807.9	40.1
		Residual	112	2256	20.15
		Number of missing values	64
		Bonferroni multiple comparisons	Number of comparisons: 8
		Control vs Sm-12/13-KO
		Row Factor	Control	Sm-12/13-KO	Difference	95% CI of diff,
		10.00	-1.176	0.01042	1.187	-5,117 to 7,491
		20.00	-0.02916	-1.27	-1.241	-7,545 to 5,063
		40.00	1.053	1.393	0.3397	-5,965 to 6,644
		60.00	2.602	0.2981	-2.304	-8,608 to 4,000
		80.00	12.77	0.6501	-12.12	-18,43 to -5,817
		100.0	21.89	2.347	-19.54	-25,84 to -13,23
		120.0	25.98	4.857	-21.13	-27,43 to -14,82
		140.0	26.92	5.393	-21.53	-27,83 to -15,23
		Row Factor	Difference	t	P value	Summary
		10.00	1.187	0.5247	P > 0,05	ns
		20.00	-1.241	0.5485	P > 0,05	ns
		40.00	0.3397	0.1502	P > 0,05	ns
		60.00	-2.304	1.018	P > 0,05	ns
		80.00	-12.12	5.359	P < 0,0001	****
		100.0	-19.54	8.638	P < 0,0001	****
		120.0	-21.13	9.339	P < 0,0001	****
		140.0	-21.53	9.518	P < 0,0001	****
Source data for figure 1C
	Pressure (mmHg)	Myogenic tone (% PDA) in Control (n=5)									Myogenic tone (% PDA) in Sm-q/11-KO (n=9)
	10	3.97	10.66	5.43	9.3	6.92					9.29	10.53	4.55	7.55	2.38	5.44	0.76	12.12	0.78
	20	5.88	24.29	8.55	13.64	7.95					11.04	18.95	7.38	16.13	11.61	9.94	6.04	16.34	4.52
	40	8.15	31.36	18.28	12.37	14.21					13.85	29.73	11.35	20.18	12.11	20.66	13.09	21.81	4.17
	60	8.85	28.65	18.32	14.18	11.92					17.14	28.5	18.54	17.23	19.12	20.87	20.93	14.5	5.85
	80	9.23	23.78	11.96	10.19	9.18					16.74	19.07	18.08	11.93	19.71	15.61	22.12	5.85	7.14
	100	5.58	13.9	9.86	7.14	7.04					14.68	8.04	12.27	5.69	19.72	8.64	18.38	3.38	5.61
		Two-way ANOVA
		Source of Variation	% of total variation	P value
		Interaction	1.05	0.95
		Column Factor	0.16	0.6834
		Row Factor	27.97	0.0001
		Source of Variation	P value summary	Significant?
		Interaction	ns	No
		Column Factor	ns	No
		Row Factor	***	Yes
		Source of Variation	Df	Sum-of-squares	Mean square	F
		Interaction	5	40.98	8.195	0.2262
		Column Factor	1	6.075	6.075	0.1677
		Row Factor	5	1088	217.7	6.007
		Residual	72	2609	36.24
		Number of missing values	24
		Bonferroni multiple comparisons	Number of comparisons: 6
		Control vs Sm-q/11-KO
		Row Factor	Control	Sm-q/11-KO	Difference	95% CI of diff,
		10.00	7.256	5.933	-1.323	-10,43 to 7,787
		20.00	12.06	11.33	-0.7342	-9,844 to 8,375
		40.00	16.87	16.33	-0.5462	-9,656 to 8,563
		60.00	16.38	18.08	1.692	-7,418 to 10,80
		80.00	12.87	15.14	2.271	-6,839 to 11,38
		100.0	8.704	10.71	2.008	-7,101 to 11,12
		Row Factor	Difference	t	P value	Summary
		10.00	-1.323	0.3939	P > 0,05	ns
		20.00	-0.7342	0.2187	P > 0,05	ns
		40.00	-0.5462	0.1627	P > 0,05	ns
		60.00	1.692	0.5038	P > 0,05	ns
		80.00	2.271	0.6763	P > 0,05	ns
		100.0	2.008	0.5981	P > 0,05	ns
Source data for figure 1D
	Pressure (mmHg)	Myogenic tone (% PDA) in Control mice (n=27)
	10	11.01	0.97	3.97	10.66	7.07	1.79	7.41	11.4	5.43	2.63	3.84	9.3	5.15	6.92	5.45	1.87	11.49	4.52	3.42	6.77	4.9	8.09	6.42	14.38	4.72	6.09	14.43
	20	20.8	9.76	5.88	24.29	13.22	4.62	12.2	12.31	8.55	8.46	7.31	13.64	11.71	7.95	6.11	5.51	17	7.98	8.1	6.8	7.71	10.48	10.77	17.75	10	8.2	19.18
	40	25.55	16.56	8.15	31.36	11.27	13.92	23.4	17.88	18.28	14.56	9.8	12.37	20.59	14.21	22.44	16.67	25.83	6.62	2.62	4.63	13.96	8.81	18.54	21.43	18.62	15.79	24.61
	60	23.61	18.01	8.85	28.65	16.45	21.84	24.66	18.47	18.32	22.35	11.78	14.18	19.72	11.92	22.02	22.81	32.06	12.23	6.51	7.12	21.54	13.73	14.52	17.63	16.23	17.29	20.94
	80	23.97	16.05	9.23	23.78	19.57	22.35	21.62	19.25	11.96	20.11	10.23	10.19	17.12	9.18	16.86	24.29	30.88	15.56	10.16	7.6	24.45	14.73	11.25	13.41	9.62	15.52	11.99
	100	21.71	12.88	5.58	13.9	19.51	12.09	20.67	17.68	9.86	17.78	7.7	7.14	13.33	7.04	13.22	26.52	32.61	15.34	12.28	9.17	26.36	12.73	8.02	9.16	3.77	12.4	4.54
	Pressure (mmHg)	Myogenic tone (% PDA) in Sm-12/13-KO (n=21)
	10	5.34	3.63	9.84	6.56	8.94	8.23	11.42	3.91	6.2	8.62	6.69	3.83	9.88	7.84	4.84	0	1.82	5.26	4.26	3.06	6.28
	20	8.2	7.16	11.35	8.39	13.67	6.24	10.37	5.41	7.43	13.27	9.37	6.91	13.08	11.42	11.35	4.8	4.8	10.71	9.17	7.57	7.66
	40	10.58	9.41	8.92	7.05	21.51	7.42	14.99	18.08	6.78	24.06	11.52	22.89	9	12.5	8.59	8.5	6	9.38	12.03	10.36	5.1
	60	14.63	12.53	11.32	11.59	25.53	11.48	18.12	18.13	11.67	21.85	8.48	20.53	8.37	8.81	8.05	4.29	5.7	6.1	9.35	9.4	4.29
	80	13.89	14.97	10.98	13.61	25.02	13.32	18.54	18.28	10.68	17.44	6.78	16.4	6.43	7.24	6.25	3.57	3.11	3.61	8.39	6.33	4.54
	100	12.42	14.27	12.28	12.28	21.24	13.63	15.4	17.28	10.38	13.32	5.91	11.18	3.72	4.68	4.47	1.45	1.23	1.8	8.22	4.38	4.22
		Two-way ANOVA
		Source of Variation	% of total variation	P value
		Interaction	2.05	0.1449
		Column Factor	8.5	< 0,0001
		Row Factor	19.18	< 0,0001
		Source of Variation	P value summary	Significant?
		Interaction	ns	No
		Column Factor	****	Yes
		Row Factor	****	Yes
		Source of Variation	Df	Sum-of-squares	Mean square	F
		Interaction	5	256.8	51.37	1.658
		Column Factor	1	1062	1062	34.29
		Row Factor	5	2398	479.5	15.48
		Residual	276	8550	30.98
		Number of missing values	36
		Bonferroni multiple comparisons	Number of comparisons: 6
		Control vs Sm-12/13-KO
		Row Factor	Control	Sm-12/13-KO	Difference	95% CI of diff,
		10.00	6.67	6.021	-0.6489	-4,952 to 3,655
		20.00	10.97	8.968	-2.006	-6,309 to 2,298
		40.00	16.24	11.65	-4.589	-8,892 to -0,2852
		60.00	17.91	11.92	-5.99	-10,29 to -1,686
		80.00	16.33	10.92	-5.408	-9,711 to -1,104
		100.0	13.81	9.227	-4.588	-8,891 to -0,2843
		Row Factor	Difference	t	P value	Summary
		10.00	-0.6489	0.4007	P > 0,05	ns
		20.00	-2.006	1.238	P > 0,05	ns
		40.00	-4.589	2.834	P < 0,05	*
		60.00	-5.99	3.699	P < 0,01	**
		80.00	-5.408	3.339	P < 0,01	**
		100.0	-4.588	2.833	P < 0,05	*
Source data for figure 1E
	Control		Sm-q/11-KO		Sm-12/13-KO		Sm-Larg-KO
	No pressure	Pressurized	No pressure	Pressurized	No pressure	Pressurized	No pressure	Pressurized
	0.9	1.57	0.9	2	0.91	1.08	0.9	1.19
	1.09	1.51	1.08	1.42	1	0.98	1	0.9
	1.1	1.61	1.15	1.58	1.09	1.09	1.1	1.12
Mean ± SEM	1,03 ± 0,06	1,56 ± 0,02	1,04 ± 0,07	1,67± 0,17	1,00 ± 0,05	1,05 ± 0,03	1,00 ± 0,05	1,07 ± 0,08
Unpaired t-test (two tailed)
P value		0.0017		0.0296		0.47		0.5404
P value summary		**		*		ns		ns
Significantly different? (P < 0.05)		Yes		Yes		No		No
t, df		t=7,484 df=4		t=3,310 df=4		t=0,7972 df=4		t=0,6684 df=4
Source data for figure 1F
		Myogenic tone (% PDA)
	Pressure (mmHg)	Control			Y-27632
	10	-3.4632	0	-1.7316	1.45985	0.5	0
	20	0	0.45045	0.225225	0	0.721	0.01
	40	-1.26984	0	-0.63492	2	1.13	0.08
	60	4.26954	9.89399	7.08177	3	2.4	0.1
	80	18.937	27.8431	23.3901	2	3.1	2.3
	100	29.6774	35.2459	32.4617	4	2.8	2.8
	120	28.7975	36.214	32.5057	3	3.1	3.1
	140	29.0221	38.843	33.9325	5	4.2	2.4
		Two-way ANOVA
		Source of Variation	% of total variation	P value
		Interaction	29.27	< 0,0001
		Column Factor	28.71	< 0,0001
		Row Factor	39.95	< 0,0001
		Source of Variation	P value summary	Significant?
		Interaction	****	Yes
		Column Factor	****	Yes
		Row Factor	****	Yes
		Source of Variation	Df	Sum-of-squares	Mean square	F
		Interaction	7	2348	335.4	64.37
		Column Factor	1	2303	2303	442
		Row Factor	7	3205	457.9	87.87
		Residual	32	166.8	5.211
		Number of missing values	32
		Bonferroni multiple comparisons	Number of comparisons: 8
		Y-27632 vs Control
		Row Factor	Y-27632	Control	Difference	95% CI of diff,
		10.00	0.6533	-1.732	-2.385	-7,841 to 3,071
		20.00	0.2437	0.2252	-0.01844	-5,474 to 5,437
		40.00	1.07	-0.6349	-1.705	-7,161 to 3,751
		60.00	1.833	7.082	5.248	-0,2074 to 10,70
		80.00	2.467	23.39	20.92	15,47 to 26,38
		100.0	3.2	32.46	29.26	23,81 to 34,72
		120.0	3.067	32.51	29.44	23,98 to 34,89
		140.0	3.867	33.93	30.07	24,61 to 35,52
		Row Factor	Difference	t	P value	Summary
		10.00	-2.385	1.28	P > 0,05	ns
		20.00	-0.01844	0.009894	P > 0,05	ns
		40.00	-1.705	0.9147	P > 0,05	ns
		60.00	5.248	2.816	P > 0,05	ns
		80.00	20.92	11.23	P < 0,0001	****
		100.0	29.26	15.7	P < 0,0001	****
		120.0	29.44	15.79	P < 0,0001	****
		140.0	30.07	16.13	P < 0,0001	****
Source data for figure 1G
	Fold change icnrease in p-MYPT1
	Control	control+Pressure	G12/13-KO	G12/13-KO+pressure
	1	12.29	1	1.28
	0.451661	6.38	0.71	1.031
	1.84233	3.73	1.6	1.045
	0.980542	3.27
Mean ± SEM	1,069 ± 0,28	6,41 ± 2,07	1,10 ± 0,26	1,11 ± 0,08
Unpaired t-test (two tailed)
P value		0.0432		0.9581
P value summary		*		ns
Significantly different? (P < 0.05)		Yes		No
t, df		t=2,555 df=6		t=0,05591 df=4
Source data for figure 1H
		Myogenic tone (% PDA)						Myogenic tone (% PDA)
	Pressure (mmHg)	Control						Sm-Larg-KO
	10	-1.96078	0	0	-1.75439	-4.51977	-2.64901	-4.67742	-2.09424	-6.74847	-2.39521	-0.49505
	20	-1.21951	4.81928	-3.58974	2.80899	-1.6129	-0.62893	-3.0435	-3.94089	-6.85714	-2.23464	0
	40	-1.53061	6.63265	0	1.36986	0	-3.60825	-6.8367	-1.10294	-16.3636	-1.7316	2.74914
	60	3.8961	13.5371	4.51389	1.99203	0.387597	-1.79372	-2.35294	2.57235	-2.0979	-1.49813	2.09581
	80	13.6929	23.1707	17.3913	13.617	15.3192	6	-1.49813	3.45912	1.2987	0	2.33236
	100	22.449	28.1746	24.7557	30	23.8739	14.2857	-0.73529	1.25392	1.94805	9.81818	1.72911
	120	25.4032	30.9804	26.3844	37.1287	29.7674	20.5128	9.12409	-0.3096	5.78778	14.3369	0
	140	28.1124	31.5175	27.9365	36.1386	30.9859	25.1309	12.9964	6.19195	3.20513	8.96057	0.566572
		Two-way ANOVA		Control vs Sm-Larg-KO
		Source of Variation	% of total variation	P value
		Interaction	13.46	< 0,0001
		Column Factor	24.1	< 0,0001
		Row Factor	46.26	< 0,0001
		Source of Variation	P value summary	Significant?
		Interaction	****	Yes
		Column Factor	****	Yes
		Row Factor	****	Yes
		Source of Variation	Df	Sum-of-squares	Mean square	F
		Interaction	7	1717	245.3	12.39
		Column Factor	1	3074	3074	155.3
		Row Factor	7	5898	842.6	42.58
		Residual	72	1425	19.79
		Number of missing values	8
		Bonferroni multiple comparisons	Number of comparisons: 8
		Row Factor	Control	Sm-Larg-KO	Difference	95% CI of diff,
		10.00	-1.814	-3.282	-1.468	-9,057 to 6,120
		20.00	0.0962	-3.215	-3.311	-10,90 to 4,277
		40.00	0.4773	-4.657	-5.134	-12,72 to 2,454
		60.00	3.756	-0.2562	-4.012	-11,60 to 3,577
		80.00	14.87	1.118	-13.75	-21,34 to -6,158
		100.0	23.92	2.803	-21.12	-28,71 to -13,53
		120.0	28.36	5.788	-22.57	-30,16 to -14,99
		140.0	29.97	6.384	-23.59	-31,17 to -16,00
		Row Factor	Difference	t	P value	Summary
		10.00	-1.468	0.545	P > 0,05	ns
		20.00	-3.311	1.229	P > 0,05	ns
		40.00	-5.134	1.906	P > 0,05	ns
		60.00	-4.012	1.489	P > 0,05	ns
		80.00	-13.75	5.103	P < 0,0001	****
		100.0	-21.12	7.841	P < 0,0001	****
		120.0	-22.57	8.381	P < 0,0001	****
		140.0	-23.59	8.756	P < 0,0001	****
Source data for figure 1I-K
		Increase in fluorescence (% Ionomycin (1µM))
	Pressure (mmHg)	Control					Sm-q/11-KO					Sm-12/13-KO					Sm-Larg-KO
	20	1.14	3.0303	3.68764	0.558659	0.26455	0.536193	0.160772	0.674536	0.236967	1.15607	1.00503	0.249377	0.247525	0.328947	0.199601	0.536193	0.160772	0.26455	2.08812
	40	4.32	7.30838	8.89371	2.51397	6.34921	3.75335	2.57235	2.02361	3.79147	8.09249	6.03015	1.49626	4.20792	5.59211	1.19761	5.75335	1.97235	6.34921	5.81628
	60	21.41	11.7647	14.3167	5.58659	7.14286	5.09383	9.48553	3.54131	13.981	10.9827	11.0553	3.24189	6.68317	8.88158	2.59481	7.09383	10.4855	7.14286	16.5914
	80	28.29	14.2602	17.3536	5.30726	25.9259	6.70241	14.4695	12.1417	21.327	14.4509	15.5779	9.22693	14.8515	19.7368	7.38523	9.70241	15.4695	27.9259	21.2786
	100	36.6	15.8645	19.3059	8.65922	25.3968	18.4987	21.2219	26.4755	31.2796	39.8844	22.6131	24.1895	20.297	26.9737	19.3613	19.4987	22.2219	27.3968	26.2347
	120	32.36	20.1426	24.5119	11.1732	26.455	26.3539	23.6334	37.4368	34.8341	35.2601	28.6432	23.9401	26.2376	34.8684	19.1617	27.3539	25.6334	28.455	26.2561
	140	29.82	30.8378	37.5271	14.8045	25.1323	34.4772	26.2058	37.6054	38.6256	31.2139	25.6281	33.9152	17.0792	22.6974	27.1457	36.4772	28.2058	29.1323	30.3308
Figure 1- Supplement 1E-G source data
Pressure (mmHg)	Control							Sm-q/11-KO					Sm-G12/13-KO					Sm-Larg-KO
20	1.11111	2.53165	1	2.22222	-0.57143	0.609756	0.724638	1.11111	1	1.06186	0.724638	1.16279	2.53165	1	1	3.07692	2.32558	3.125	0	1.4	1	4.01
40	2.98508	4.08163	1	2	0.507614	1.07527	0.641026	2.52713	3	4.17	0	-2.05128	2.52101	2.65184	2	2.46914	2.85714	0	1	2.3	2	2
60	22.0548	4.34783	13	-0.49751	1.1811	0.389105	1.9802	4.01	18	3.02	8.42105	1.04895	1	3.05343	8	-0.49505	2.15054	3.5461	3	4.03	3.3	11
80	28.0476	25.8065	32	0.442478	4.18251	15.1394	3.72093	14.0339	26	13	22.7778	18.6992	9.72222	2.75862	12	-0.94787	2.91262	2.96296	16.1	16.12	4.1	13
100	34.1053	38.5965	38	18.9744	20.1717	21.6327	18.0412	34.3396	34	29.4587	37.1951	38.4977	6.75676	12.1622	16	-1.39535	1.39535	2.77778	18.01	19.2	7	12
120	32.7273	51.8868	44	34.8571	27.4775	29.4872	27.3224	41.2844	36.1	41.8518	40.7407	36	7.69863	14.4103	18	6.96517	1.83486	2.05479	14	12.1	10.1	5
140	36.6275	54.8077	36	32.9609	29.0909	30.7692	28.2609	44.3396	32.22	50.4587	41.2121	35	6.93377	12.3478	18	5.82524	4.65116	2.68456	12	11.2	12	8
								Table Analyzed	q/11-MT				Table Analyzed	G12/13-MT				Table Analyzed	Larg-MT
								Two-way ANOVA					Two-way ANOVA					Two-way ANOVA
								Source of Variation	% of total variation	P value			Source of Variation	% of total variation	P value			Source of Variation	% of total variation	P value
								Interaction	0.65	0.8216			Interaction	14.95	< 0,0001			Interaction	16.04	< 0,0001
								Column Factor	0.75	0.0722			Column Factor	17.54	< 0,0001			Column Factor	14.28	< 0,0001
								Row Factor	82.53	< 0,0001			Row Factor	36.04	< 0,0001			Row Factor	37.9	< 0,0001
								Source of Variation	P value summary	Significant?			Source of Variation	P value summary	Significant?			Source of Variation	P value summary	Significant?
								Interaction	ns	No			Interaction	****	Yes			Interaction	****	Yes
								Column Factor	ns	No			Column Factor	****	Yes			Column Factor	****	Yes
								Row Factor	****	Yes			Row Factor	****	Yes			Row Factor	****	Yes
								Source of Variation	Df	Sum-of-squares	Mean square	F	Source of Variation	Df	Sum-of-squares	Mean square	F	Source of Variation	Df	Sum-of-squares	Mean square	F
								Interaction	6	149.4	24.89	0.4792	Interaction	6	2486	414.3	7.907	Interaction	6	2585	430.8	8.4
								Column Factor	1	173.1	173.1	3.332	Column Factor	1	2917	2917	55.67	Column Factor	1	2301	2301	44.86
								Row Factor	6	18935	3156	60.75	Row Factor	6	5992	998.7	19.06	Row Factor	6	6109	1018	19.86
								Residual	70	3636	51.95		Residual	70	3667	52.39		Residual	70	3590	51.28
								Number of missing values	14				Number of missing values	14				Number of missing values	14
								Bonferroni multiple comparisons	Number of comparisons: 7				Bonferroni multiple comparisons	Number of comparisons: 7				Bonferroni multiple comparisons	Number of comparisons: 7
								Control vs Sm-q/11-KO					Control vs Sm-G12/13-KO					Control vs Sm-LARG-KO
								Row Factor	Control	Sm-q/11-KO	Difference	95% CI of diff,	Row Factor	Control	Sm-G12/13-KO	Difference	95% CI of diff,	Row Factor	Control	Sm-LARG-KO	Difference	95% CI of diff,
								10.00	1.09	1.012	-0.07763	-11,77 to 11,62	10.00	1.09	1.987	0.8971	-10,85 to 12,64	10.00	1.09	1.827	0.7373	-10,88 to 12,36
								20.00	1.756	1.529	-0.2266	-11,92 to 11,47	20.00	1.756	2.5	0.744	-11,00 to 12,49	20.00	1.756	1.46	-0.2958	-11,92 to 11,33
								40.00	6.065	6.9	0.8349	-10,86 to 12,53	40.00	6.065	2.742	-3.323	-15,07 to 8,423	40.00	6.065	4.969	-1.096	-12,72 to 10,53
								60.00	15.62	18.9	3.282	-8,414 to 14,98	60.00	15.62	5.289	-10.33	-22,08 to 1,415	60.00	15.62	10.41	-5.207	-16,83 to 6,414
								80.00	27.07	34.7	7.624	-4,072 to 19,32	80.00	27.07	6.984	-20.09	-31,84 to -8,345	80.00	27.07	11.76	-15.32	-26,94 to -3,698
								100.0	35.39	39.2	3.801	-7,895 to 15,50	100.0	35.39	9.782	-25.61	-37,36 to -13,87	100.0	35.39	8.631	-26.76	-38,38 to -15,14
								120.0	35.5	40.65	5.144	-6,552 to 16,84	120.0	35.5	9.552	-25.95	-37,70 to -14,20	120.0	35.5	9.137	-26.37	-37,99 to -14,74
								Row Factor	Difference	t	P value	Summary	Row Factor	Difference	t	P value	Summary	Row Factor	Difference	t	P value	Summary
								10.00	-0.07763	0.01839	P > 0,05	ns	10.00	0.8971	0.2117	P > 0,05	ns	10.00	0.7373	0.1758	P > 0,05	ns
								20.00	-0.2266	0.0537	P > 0,05	ns	20.00	0.744	0.1756	P > 0,05	ns	20.00	-0.2958	0.07054	P > 0,05	ns
								40.00	0.8349	0.1978	P > 0,05	ns	40.00	-3.323	0.7841	P > 0,05	ns	40.00	-1.096	0.2613	P > 0,05	ns
								60.00	3.282	0.7778	P > 0,05	ns	60.00	-10.33	2.438	P > 0,05	ns	60.00	-5.207	1.242	P > 0,05	ns
								80.00	7.624	1.806	P > 0,05	ns	80.00	-20.09	4.74	P < 0,0001	****	80.00	-15.32	3.653	P < 0,01	**
								100.0	3.801	0.9008	P > 0,05	ns	100.0	-25.61	6.043	P < 0,0001	****	100.0	-26.76	6.383	P < 0,0001	****
								120.0	5.144	1.219	P > 0,05	ns	120.0	-25.95	6.123	P < 0,0001	****	120.0	-26.37	6.288	P < 0,0001	****
