# Supplementary material for: Myogenic vasoconstriction requires G12/G13 and LARG to maintain local and systemic vascular resistance
Source: eLife. 2019 Sep 24;8:e49374. doi: 10.7554/eLife.49374 (PMC6777979; doi:10.7554/eLife.49374)
Supplement: Figure 2—source data 1. [file elife-49374-fig2-data1.xlsx]

## Sheet: Sheet1
Source data for figure 2A
	Gq12/13 KO										Control															Gq11 KO
Perfusion pressure (mmHg)	RVR (mmhg*min/ml):							Mean	SEM		RVR (mmhg*min/ml):												MW	SEM		RVR (mmhg*min/ml):							Mean	SEM
130	9.49782	9.83011	6.6531	7.9342	9.5656	9.96905	9.22717	8.95386	0.459722		11.0928	8.72108	10.7769	8.47314	9.21169	10.3979	10.36	11.1889	9.28703	9.13603	9.50966	8.80845	9.74697	0.278446		18.6974	20.5812	16.2208	12.8774	9.08602	14.7449	9.2614	14.4956	1.66909
115	8.73952	9.17575	6.24113	7.59891	9.258	8.55309	8.56967	8.30515	0.400741		10.2103	8.16544	9.60009	7.86574	8.89175	9.76045	9.06012	10.0596	7.83596	7.94098	8.28	8.12126	8.81598	0.259444		17.2175	19.454	14.0156	11.2578	7.51047	13.5533	7.64406	12.9504	1.70865
100	8.39444	8.78823	6.33777	7.30278	9.34264	7.50842	8.25714	7.9902	0.382217		10.1786	8.32991	8.83441	7.03125	8.79121	8.91577	8.45384	8.89288	7.03747	7.00092	7.6569	7.21998	8.19526	0.290648		15.7037	18.5156	13.3705	10.3128	6.79245	11.9394	7.16947	11.972	1.62822
85	8.31646	8.77843	6.29365	6.85302	9.70693	6.68528	8.09586	7.81852	0.471928		10.0311	8.34381	8.24949	6.68852	8.63309	8.15574	8.12579	8.29064	6.58065	6.39479	7.56321	6.55481	7.80097	0.313173		13.9907	18.1978	12.9492	9.65058	6.64773	10.8425	7.05205	11.3329	1.5442
70	8.79549	8.90196	6.47399	6.4225	10.2361	6.22326	8.18342	7.89096	0.584947		9.76346	7.97866	7.67509	6.35561	8.79121	7.58164	8.08101	9.58838	6.41357	6.0922	7.67679	6.3017	7.69161	0.361544		12.5	17.4448	12.4729	9.43652	6.69528	9.89036	6.82695	10.7524	1.42383
55	9.00791	9.09985	6.44903	6.22497	10.1535	6.58111	8.41975	7.99087	0.589755		10.102	8.07887	7.90266	6.32251	7.76928	7.79744	8.63934	7.99853	6.20736	6.34157	7.86185	6.34813	7.61413	0.333442		13.0134	17.3569	12.1058	9.78199	7.42215	8.89729	7.68053	10.894	1.33926
RVR in % of value at 55 mmHg:
130	105.439	108.025	103.164	127.458	94.2102	151.48	109.59	114.195	7.27532		109.808	107.949	136.371	134.015	118.566	133.35	119.917	139.887	149.613	144.066	120.96	138.757	129.438	3.92081		143.678	118.577	133.991	131.643	122.418	165.724	120.583	133.802	6.2819
115	97.0205	100.834	96.7763	122.072	91.1807	129.964	101.781	105.661	5.48066		101.071	101.072	121.479	124.408	114.448	125.175	104.871	125.769	126.237	125.221	105.319	127.931	116.917	3.12433		132.306	112.082	115.776	115.087	101.19	152.331	99.5252	118.328	6.99467
100	93.1897	96.5755	98.2748	117.314	92.0142	114.09	98.0687	101.361	3.82332		100.758	103.107	111.79	111.21	113.154	114.342	97.8528	111.181	113.373	110.397	97.3932	113.734	108.191	1.86777		120.673	106.676	110.447	105.427	91.516	134.191	93.346	108.897	5.65217
85	92.3241	96.4679	97.5905	110.089	95.6021	101.583	96.1532	98.5443	2.18657		99.2973	103.279	104.389	105.789	111.118	104.595	94.0557	103.652	106.014	100.839	96.2014	103.256	102.707	1.32397		107.51	104.845	106.967	98.6566	89.5661	121.863	91.8172	103.032	4.13948
70	97.6419	97.8253	100.387	103.173	100.814	94.5624	97.1931	98.7995	1.07493		96.6484	98.7596	97.1203	100.524	113.154	97.2325	93.5374	119.877	103.322	96.0678	97.6461	99.2686	101.096	2.231		96.0549	100.507	103.032	96.4682	90.2068	111.161	88.8864	98.0452	2.90622
55	100	100	100	100	100	100	100	100	0		100	100	100	100	100	100	100	100	100	100	100	100	100	0		100	100	100	100	100	100	100	100	0
	Isolated perfused mouse kidney: Kidneys were perfused ex-situ as described in detail previously (Demerath T, et al. , Am J Physiol Renal Physiol. 2014 Jun 15;306(12):F1489-98.
		The perfusion medium consisted of a modified Krebs-Henseleit buffer supplemented with bovine serum albumin (6 g/100 ml) and human erythrocytes (10% hematocrit).
		The renal vein was cannulated and samples of the venous perfusate were collected every 2 minutes to determine the renal blood flow.
		Three samples were taken during each experimental period and the last two values of each experimental period were averaged for statistical analysis. These data are shown in the table below.
		To determine the pressure-dependent regulation of vascular resistance, the perfusion pressure was changed in steps of 15 mmHg between 130 mmHg and 55 mmHg.
	Calculation of Renal Vascular Resistance (RVR):
		RVR = perfusion pressure / perfusate flow
Source data for figure 2B-C
	Control		Sm-q/11-KO		Sm-12/13-KO		Sm-Larg-KO
	Before tamoxifen	After tamoxifen	Before tamoxifen	After tamoxifen	Before tamoxifen	After tamoxifen	Before tamoxifen	After tamoxifen
	352	374	299	501	414	531	333	563
	401	444	393	437	399	575	444	439
	407	419	445	480	350	601	238	528
	426	378	490	475	440	409	412	613
	407	399	268	380	388	523	409	590
	268	269	370	265	264	461	330	448
	332	294			270	570
	370	340			340	574
Mean ± SEM	370 ± 18	365 ± 21	377,5 ± 34	423,0 ± 36	358,1 ± 23	530,5 ± 23	361,0 ± 30	530,2 ± 29
Unpaired t test
P value		0.8412		0.3833		0.0001		0.0028
P value summary		ns		ns		***		**
Significantly different? (P < 0.05)		No		No		Yes		Yes
One- or two-tailed P value?		Two-tailed		Two-tailed		Two-tailed		Two-tailed
t, df		t=0,2041 df=14		t=0,9118 df=10		t=5,290 df=14		t=3,942 df=10
Source data for figure 2D
	Control	Sm-q/11-KO	Sm-12/13-KO	Sm-Larg-KO
	After tamoxifen	After tamoxifen	After tamoxifen	After tamoxifen
	1613	1525	1701	1781
	1561	1580	1763	1710
	1580	1660	1579	1678
	1630	1568	1536	1801
	1434	1430	1797	1678
	1305		1584
			1774
			1752
Mean ± SEM	1521 ± 51	1553 ± 37	1686 ± 36	1730 ± 26
		Control vs Sm-q/11-KO	Control vs Sm-12/13-KO	Control vs Sm-Larg-KO
Unpaired t test (Two-tailed)
P value:		0.6399	0.0195	0.0179
P value summary		ns	*	*
Are means signif. different? (P < 0.05)		No	Yes	Yes
t, df:		t=0,4840 df=9	t=2,696 df=12	t=3,395 df=9
Figure 2 -Supplementray Figure 1 source data
Fig.2 Suppl fig 1A
	Urine volume
	Control	Sm-q/11-KO	Sm-12/13-KO	Sm-LARG-KO
	1.12	1.23	2.15	0.85
	0.925	1.62	1.19	1.385
	0.7	1.75	1.35	1.15
	0.9	0.51	1.015	0.919
	2.37	1.12	1.3	0.96
	1.02		1.08
	1.86		1.62
Mean ± SEM	1,271 ± 0,23	1,246 ± 0,21	1,386 ± 0,14	1,271 ± 0,23
Unpaired t test (two tailed)
P value		0.9418	0.6797	0.466
P value summary		ns	ns	ns
Significantly different? (P < 0.05)		No	No	No
t, df		t=0,07490 df=10	t=0,4232 df=12	t=0,7579 df=10
Fig.2 Suppl fig 1B	Glomerular filteration rate
	Control	Sm-G12/13-KO	Sm-q/11-KO
	7.53	10.89	6.95
	7.47	8.81	8.7
	6.42	9.82	8.29
	8.43	6.98
	9.96
	12.06
	5.75
	10.96
	9.51
	10.01
Mean ± SEM	8,8± 0,6	8,8 ± 0,6	7,9 ± 0,5
Unpaired t test (two tailed)
P value		0.7889	0.5157
P value summary		ns	ns
Significantly different? (P < 0.05)		No	No
t, df		t=0,2738 df=12	t=0,6716 df=11
Fig.2 Suppl fig 1C	Blood Urea Nitrogen (BUN)
	Control	Sm-G12/13-KO
	23	23
	24	26
	25
Mean ± SEM	24,00 ± 0,5	24,5 ± 1,5
Unpaired t test (two tailed)
P value		0.7345
P value summary		ns
Significantly different? (P < 0.05)		No
t, df		t=0,3721 df=3
Fig.2 Suppl Fig 1D	Creatinine
	Control	Sm-G12/13-KO
	0.1	0.12
	0.1	0.1
	0.11
Mean ± SEM	0,1033 ± 0,01	0,1100 ± 0,01
Unpaired t test (two tailed)
P value		0.495
P value summary		ns
Significantly different? (P < 0.05)		No
t, df		t=0,7746 df=3
Fig.2 Suppl Fig 1E
	Activity (Average counts)
	Time	Control				Sm-G12/13-KO
	06:00	245.5	376.167	406	409.667	387.833	318.333	325.833	275
	07:00	213.5	218.5	276.167	308.333	89.6667	223.167	207.667	54.8333
	08:00	138.167	135	323.333	125	33.1667	12.6667	1.66667	19.6667
	09:00	32	140.5	91	249.667	177	55.1667	32.1667	154.833
	10:00	64.8333	151.667	35	77	84.1667	77.8333	62	33.1667
	11:00	198.167	75.5	275.833	114.333	189.167	69.8333	53.1667	112.167
	12:00	104.5	68.3333	19.8333	47.8333	18.5	53.8333	43.6667	21
	13:00	82.5	89.5	102.167	15	44.5	23.8333	6	52.6667
	14:00	32.3333	87.1667	108.333	157.833	11.6667	84.6667	65.5	38.8333
	15:00	148.833	127.167	75	93.1667	28.5	35	16.6667	175.167
	16:00	92.3333	63.1667	181.167	29.8333	108.333	102.5	85.1667	28.3333
	17:00	56.1667	129.167	24.3333	115	78.8333	144.333	112	119.833
	18:00	113.667	80.3333	119.167	61.5	74.6667	109.167	92.5	79
	19:00	198.833	212.833	194.667	270.667	300.667	134.333	93.6667	169.833
	20:00	314.333	242.667	344.167	236.333	406.667	342.5	348.667	438.5
	21:00	227.333	216.833	340.667	255.667	563.333	260	285.333	406.667
	22:00	256.833	178.5	516.5	331	556.667	268.667	294.667	800.5
	23:00	122.667	168.333	706.833	161.333	432	216.333	209.333	361.833
	00:00	277.833	319.333	275.5	249.167	526.833	378.333	364.667	238.167
	01:00	207.333	221.833	341.5	571.833	234	289.5	357.333	86.1667
	02:00	114	207	800.667	465.333	464.333	180.667	137.667	295
	03:00	157.5	46.1667	33.8333	126.167	108.833	191.333	186	121.833
	04:00	154.5	103.667	66.6667	207.667	228	272	243.333	329.5
	05:00	244	190	508.333	119.833	340.833	185.667	165.333	100.667
	06:00	391.5	462.667	17.5	320	69.1667	155.333	143.167	298.667
	07:00	64.6667	195.333	361.333	88.8333	476	117.5	100.333	29.8333
	08:00	45.6667	116.667	16	325	9.16667	58	29.3333	14.5
	09:00	123.5	34.6667	86.8333	34	128.833	95.5	73.3333	75
	10:00	154.833	58.1667	212.333	15.8333	6.16667	77	53.8333	20.5
	11:00	214.167	102	13.5	49.3333	37.3333	50.6667	31.5	46.1667
	12:00	38.1667	70.6667	53.3333	11.6667	278.667	27.5	20	15.3333
	13:00	49.0833	75.6667	54.25	90.5	141.5	87.5833	69.3333	81.5
	14:00	136.667	54	48.5	5.83333	56.6667	7	3.83333	9.33333
	15:00	49.1667	23	29.3333	44.3333	25.6667	89.6667	66.6667	62
	16:00	67.3333	35.8333	189.167	29.5	176.5	89	71.6667	80.6667
	17:00	77.8333	157.667	146.667	89	15.6667	119.667	90.5	67
	18:00	59.1667	85.3333	88	215.5	94.5	35.5	20.1667	67.6667
	19:00	152.5	187	187.333	237.167	284.333	142.667	117	88.3333
	20:00	312.833	298.167	210.5	547.5	689.333	532.333	220	679.667
	21:00	200	164.833	345.5	175.333	421.667	196.667	183.167	652
	22:00	196.5	121.833	347	218.667	764.833	267.333	269.833	353.167
	23:00	154.5	299	413.667	408.5	814	239.667	227	316.833
	00:00	131.5	111.167	120.667	202	368.667	141.667	115.167	387.5
	01:00	275.333	244.333	473.333	435.5	419.833	128.333	110.167	138.167
	02:00	34.6667	171.167	71.5	363.167	119.333	202.5	195.333	398
	03:00	155	146.667	339.667	74.1667	296.333	123	87.1667	222.5
	04:00	111.5	140.667	62.5	295.167	234.833	139.333	117.667	276.833
	05:00	92.3333	424.167	318.333	107.333	99.1667	180	175.5	245
	06:00	168.833	374.833	245.333	346.667	312.833	233	227.667	130
	Two-way ANOVA
	Source of Variation	% of total variation	P value
	Interaction	8.21	0.1217
	Column Factor	0	0.9504
	Row Factor	52.16	< 0,0001
	Source of Variation	P value summary	Significant?
	Interaction	ns	No
	Column Factor	ns	No
	Row Factor	****	Yes
	Source of Variation	Df	Sum-of-squares	Mean square	F
	Interaction	48	723973	15083	1.27
	Column Factor	1	45.98	45.98	0.003871
	Row Factor	48	4597000	95775	8.063
	Residual	294	3492000	11879
	Number of missing values	0
	Bonferroni multiple comparisons	Number of comparisons: 49
	Control vs Sm-G12/13-KO
	Row Factor	Control	Sm-G12/13-KO	Difference	95% CI of diff,		Row Factor	Difference	t	P value	Summary
	06:00	359.3	326.8	-32.58	-288,3 to 223,1		06:00	-32.58	0.4228	P > 0,05	ns
	07:00	254.1	143.8	-110.3	-366,0 to 145,4		07:00	-110.3	1.431	P > 0,05	ns
	08:00	180.4	16.79	-163.6	-419,3 to 92,13		08:00	-163.6	2.123	P > 0,05	ns
	09:00	128.3	104.8	-23.5	-279,2 to 232,2		09:00	-23.5	0.3049	P > 0,05	ns
	10:00	82.13	64.29	-17.83	-273,5 to 237,9		10:00	-17.83	0.2314	P > 0,05	ns
	11:00	166	106.1	-59.87	-315,6 to 195,8		11:00	-59.87	0.7769	P > 0,05	ns
	12:00	60.13	34.25	-25.88	-281,6 to 229,8		12:00	-25.88	0.3357	P > 0,05	ns
	13:00	72.29	31.75	-40.54	-296,3 to 215,2		13:00	-40.54	0.5261	P > 0,05	ns
	14:00	96.42	50.17	-46.25	-302,0 to 209,5		14:00	-46.25	0.6001	P > 0,05	ns
	15:00	111	63.83	-47.21	-302,9 to 208,5		15:00	-47.21	0.6126	P > 0,05	ns
	16:00	91.63	81.08	-10.54	-266,3 to 245,2		16:00	-10.54	0.1368	P > 0,05	ns
	17:00	81.17	113.8	32.58	-223,1 to 288,3		17:00	32.58	0.4228	P > 0,05	ns
	18:00	93.67	88.83	-4.833	-260,5 to 250,9		18:00	-4.833	0.06272	P > 0,05	ns
	19:00	219.3	174.6	-44.63	-300,3 to 211,1		19:00	-44.63	0.579	P > 0,05	ns
	20:00	284.4	384.1	99.71	-156,0 to 355,4		20:00	99.71	1.294	P > 0,05	ns
	21:00	260.1	378.8	118.7	-137,0 to 374,4		21:00	118.7	1.54	P > 0,05	ns
	22:00	320.7	480.1	159.4	-96,30 to 415,1		22:00	159.4	2.069	P > 0,05	ns
	23:00	289.8	304.9	15.08	-240,6 to 270,8		23:00	15.08	0.1957	P > 0,05	ns
	00:00	280.5	377	96.54	-159,2 to 352,3		00:00	96.54	1.253	P > 0,05	ns
	01:00	335.6	241.8	-93.88	-349,6 to 161,8		01:00	-93.88	1.218	P > 0,05	ns
	02:00	396.8	269.4	-127.3	-383,0 to 128,4		02:00	-127.3	1.652	P > 0,05	ns
	03:00	90.92	152	61.08	-194,6 to 316,8		03:00	61.08	0.7926	P > 0,05	ns
	04:00	133.1	268.2	135.1	-120,6 to 390,8		04:00	135.1	1.753	P > 0,05	ns
	05:00	265.5	198.1	-67.42	-323,1 to 188,3		05:00	-67.42	0.8748	P > 0,05	ns
	06:00	297.9	166.6	-131.3	-387,0 to 124,4		06:00	-131.3	1.704	P > 0,05	ns
	07:00	177.5	180.9	3.375	-252,3 to 259,1		07:00	3.375	0.04379	P > 0,05	ns
	08:00	125.8	27.75	-98.08	-353,8 to 157,6		08:00	-98.08	1.273	P > 0,05	ns
	09:00	69.75	93.17	23.42	-232,3 to 279,1		09:00	23.42	0.3038	P > 0,05	ns
	10:00	110.3	39.38	-70.92	-326,6 to 184,8		10:00	-70.92	0.9202	P > 0,05	ns
	11:00	94.75	41.42	-53.33	-309,0 to 202,4		11:00	-53.33	0.692	P > 0,05	ns
	12:00	43.46	85.38	41.92	-213,8 to 297,6		12:00	41.92	0.5439	P > 0,05	ns
	13:00	67.38	94.98	27.6	-228,1 to 283,3		13:00	27.6	0.3582	P > 0,05	ns
	14:00	61.25	19.21	-42.04	-297,8 to 213,7		14:00	-42.04	0.5455	P > 0,05	ns
	15:00	36.46	61	24.54	-231,2 to 280,3		15:00	24.54	0.3184	P > 0,05	ns
	16:00	80.46	104.5	24	-231,7 to 279,7		16:00	24	0.3114	P > 0,05	ns
	17:00	117.8	73.21	-44.58	-300,3 to 211,1		17:00	-44.58	0.5785	P > 0,05	ns
	18:00	112	54.46	-57.54	-313,3 to 198,2		18:00	-57.54	0.7466	P > 0,05	ns
	19:00	191	158.1	-32.92	-288,6 to 222,8		19:00	-32.92	0.4271	P > 0,05	ns
	20:00	342.3	530.3	188.1	-67,63 to 443,8		20:00	188.1	2.441	P > 0,05	ns
	21:00	221.4	363.4	142	-113,8 to 397,7		21:00	142	1.842	P > 0,05	ns
	22:00	221	413.8	192.8	-62,92 to 448,5		22:00	192.8	2.502	P > 0,05	ns
	23:00	318.9	399.4	80.46	-175,3 to 336,2		23:00	80.46	1.044	P > 0,05	ns
	00:00	141.3	253.3	111.9	-143,8 to 367,6		00:00	111.9	1.452	P > 0,05	ns
	01:00	357.1	199.1	-158	-413,7 to 97,71		01:00	-158	2.05	P > 0,05	ns
	02:00	160.1	228.8	68.67	-187,0 to 324,4		02:00	68.67	0.891	P > 0,05	ns
	03:00	178.9	182.3	3.375	-252,3 to 259,1		03:00	3.375	0.04379	P > 0,05	ns
	04:00	152.5	192.2	39.71	-216,0 to 295,4		04:00	39.71	0.5152	P > 0,05	ns
	05:00	235.5	174.9	-60.62	-316,3 to 195,1		05:00	-60.62	0.7867	P > 0,05	ns
	06:00	283.9	225.9	-58.04	-313,8 to 197,7		06:00	-58.04	0.7531	P > 0,05	ns
Fig.2 Suppl Fig 1F
	Running distance (cm/48 hr)
	Control	Sm-G12/13-KO
	50695	103592
	65055	62622
	95892	108184
	70941	73301
Mean ± SEM	70646 ± 9428	86925 ± 11203
Unpaired t test (two tailed)
P value		0.3088
P value summary		ns
Significantly different? (P < 0.05)		No
t, df		t=1,112 df=6
Fig.2 Suppl Fig 1G
	Latency to fall (Rotarod test)
	Control	Sm-q/11-KO	Sm-12/13-KO	Sm-Larg-KO
	110.87	128	88	106
	76.63	94	97	72
	129.27	101	116	98
	99	88	123	109
	91.34	106	79	80
	117.16	76	107	118
Mean ± SEM	104,0 ± 7,7	98,8 ± 7,2	101,7 ± 6,8	97,1 ± 7,2
Unpaired t test (two tailed)
P value		0.6331	0.8226	0.5312
P value summary		ns	ns	ns
Significantly different? (P < 0.05)		No	No	No
t, df		t=0,4923 df=10	t=0,2301 df=10	t=0,6486 df=10
Fig.2 Suppl Fig 1H	Mesh grip test
	Control	Sm-q/11-KO	Sm-G12/13-KO	Sm-LARG-KO
	258	292	350	297
	312	333	304	306
	323	288	292	307
	311	285	310	256
Mean ± SEM	301,0 ± 14,59	299,5 ± 11,26	314,0 ± 12,57,	291,5 ± 12,05
Unpaired t test (two tailed)		0.9378	0.5248
P value		ns	ns	ns
P value summary		No	No	No
Significantly different? (P < 0.05)		t=0,08140 df=6	t=0,6751 df=6	t=0,5021 df=6
t, df
Fig.2 Suppl Fig 1I
	Bar cross test (paw slippings)
	Control	Sm-G12/13-KO
	6	4
	4	3
	6	6
	5	7
Mean ± SEM	5,250 ± 0,4	5,000 ± 0,9
Unpaired t test (two tailed)
P value		0.8164
P value summary		ns
Significantly different? (P < 0.05)		No
t, df		t=0,2425 df=6
