# Supplementary material for: Myogenic vasoconstriction requires G12/G13 and LARG to maintain local and systemic vascular resistance
Source: eLife. 2019 Sep 24;8:e49374. doi: 10.7554/eLife.49374 (PMC6777979; doi:10.7554/eLife.49374)
Supplement: Figure 3—source data 1. [file elife-49374-fig3-data1.xlsx]

## Sheet: Sheet1
Source data for figure 3A
Heart weight/Tibia length (mg/mm)
	Control	Sm-12/13-KO
	6.82796	9.57447		Unpaired t test
	7.78378	6.98925		P value	0.0055
	6.38889	9.00524		P value summary	**
	6.48352	9.10053		Significantly different? (P < 0.05)	Yes
	6.81081	12.9412		One- or two-tailed P value?	Two-tailed
	6.48936	8.66667		t, df	t=3,376 df=12
	6.52174	8.11094
Mean ± SEM	6,758 ± 0,2	9,198 ± 0,7
Cardiomyocyte cross sectional area (CSA, µm2)
	Control	Sm-12/13-KO
	197	263		Unpaired t test
	182	224		P value	0.0145
	178	248		P value summary	*
		214		Are means signif. different? (P < 0.05)	Yes
Mean ± SEM	185,7 ± 5,783	237,3 ± 11,16		One- or two-tailed P value?	Two-tailed
				t, df	t=3,668 df=5
Capillary density (per mm2 area)
	Control	Sm-12/13-KO		Unpaired t test
	2605	3200		P value	0.0987
	2750	2905		P value summary	ns
	2960	3503		Significantly different? (P < 0.05)	No
Mean ± SEM	2772 ± 103	3203 ± 172		One- or two-tailed P value?	Two-tailed
				t, df	t=2,144 df=4
Source data for figure 3B
Left ventricular mass/tibia length (mg/mm)
	Control	Sm-12/13-KO
	2.74247	3.41117		Unpaired t test
	3.25838	2.91129		P value	0.0204
	2.99278	3.72251		P value summary	*
	3.05824	3.73757		Significantly different? (P < 0.05)	Yes
	2.65946	5.1385		One- or two-tailed P value?	Two-tailed
	3.1	3.44308		t, df	t=2,672 df=12
	3.07554	3.61591
Mean ± SEM	2,984 ± 0,08	3,711 ± 0,26
Source data for figure 3C
Left ventricular ejection fraction (LVEF, %)
	Control	Sm-12/13-KO
	64.69	67		Unpaired t test
	58.56	59.35		P value	0.0113
	48.01	70.26		P value summary	*
	55.47	62.13		Significantly different? (P < 0.05)	Yes
	57.9	79.82		One- or two-tailed P value?	Two-tailed
	47.95	66.91		t, df	t=2,951 df=13
	50.99	61.81
Mean ± SEM	54,80 ± 2,3	66,75 ± 2,6
Left ventricular end diastolic volume (LVED, µl)
	Control	Sm-12/13-KO
	51.66	52.72		Unpaired t test
	57.5	55.06		P value	0.398
	57.92	57.17		P value summary	ns
	51.18	55.09		Are means signif. different? (P < 0.05)	No
	56.13	76.86		One- or two-tailed P value?	Two-tailed
	54.69	64.02		t, df	t=0,8764 df=12
	66.77	57.7
Mean ± SEM	59,80 ± 3	59,8 ± 3
Left ventricular end systolic volume (LVES, µl)
	Control	Sm-12/13-KO
	20.24	17.45		Unpaired t test
	27.97	22.22		P value	0.0135
	33.11	20.39		P value summary	*
	27.24	13.41		Significantly different? (P < 0.05)	Yes
	23.62	29.11		One- or two-tailed P value?	Two-tailed
	28.47	12.92		t, df	t=2,895 df=12
	32.72	22.03
Mean ± SEM	27,62 ± 1,74	19,65 ± 2,13
Left ventricular stroke volume (LVSV, ml)
	Control	Sm-12/13-KO
	31.42	35.27		Unpaired t test
	29.53	32.84		P value	0.0029
	24.81	36.78		P value summary	**
	23.94	41.68		Significantly different? (P < 0.05)	Yes
	32.51	47.75		One- or two-tailed P value?	Two-tailed
	26.22	51.1		t, df	t=3,716 df=12
	34.05	35.67
Mean ± SEM	28,93 ± 1,5	40,16 ± 2,6
Cardiac output (CO, ml/min)
	Control	Sm-12/13-KO
	11.6254	12.3445		Unpaired t test
	9.7449	11.1656		P value	0.0048
	8.4354	12.1374		P value summary	**
	7.9002	16.672		Significantly different? (P < 0.05)	Yes
	11.0534	23.875		One- or two-tailed P value?	Two-tailed
	9.4392	20.44		t, df	t=3,453 df=12
	10.896	17.835
Mean ± SEM	9,871 ± 0,5272	16,35 ± 1,802
Heart rate (b/min)
	Control	Sm-12/13-KO
	370	350		Unpaired t test
	330	340		P value	0.052
	340	330		P value summary	ns
	330	400		Significantly different? (P < 0.05)	No
	340	500		One- or two-tailed P value?	Two-tailed
	330	400		t, df	t=2,157 df=12
	360	500
Mean ± SEM	342 ± 6	402 ± 27
