# Supplementary material for: Myogenic vasoconstriction requires G12/G13 and LARG to maintain local and systemic vascular resistance
Source: eLife. 2019 Sep 24;8:e49374. doi: 10.7554/eLife.49374 (PMC6777979; doi:10.7554/eLife.49374)
Supplement: Figure 4—source data 1. [file elife-49374-fig4-data1.xlsx]

## Sheet: Sheet1
Source data for 4A
	Nppa		Nppb		Myh7		Acta1		Fgf2		Postn		Col1		Col3		Tgfβ		Ctgf
	Control	Sm-12/13-KO	Control	Sm-12/13-KO	Control	Sm-12/13-KO	Control	Sm-12/13-KO	Control	Sm-12/13-KO	Control	Sm-12/13-KO	Control	Sm-12/13-KO	Control	Sm-12/13-KO	Control	Sm-12/13-KO	Control	Sm-12/13-KO
	0.89	0.68	0.94	0.68	1.04	0.87	0.97	0.32	1.07	1.07	0.81	0.71	1.04	0.66	1	0.97	0.84	1	1	0.57
	1.1	0.81	1	0.58	0.92	1.14	0.99	0.24	0.98	0.84	1.15	1.3	1.07	0.72	0.92	0.86	1.1	0.68	1	0.94
	1	0.9	1.19	0.93	0.94	0.72	1	0.4	0.99	1.02	1	0.87	0.95	0.77	0.73	0.54	1	0.7	0.82	0.77
	1	0.57	1	0.75	1	0.66	1.14	0.73	0.87	0.99	0.89	1.03	1	0.51	0.98	1.09	0.91	1.04	1	0.94
	1	0.68	0.75	0.55	0.99	1.3	0.75	0.313166	1.4	0.95	0.9	0.97	1.3	1.26	0.78	1.05	1.07	0.87	1.11	0.75
	1.22	0.36	1.04	0.6	0.93	1.14	0.38	0.75	0.83	1.07	0.97	1.13	0.91	1.14	0.93	1.24	1.11	0.93	1.07	0.42
	0.76	0.34	0.92	0.8	0.82	1.2	0.61	0.62	1	0.91	0.88	1.4	0.86	1.29	1.55	1.45	1.2	0.94	0.77	0.29
	0.99	1.34	0.86	0.52	1.08	0.84	1.12	0.31	0.99	1.25	0.93	0.74	0.95	1.36	1	1.46	0.876	0.9	1.55	0.3
	1.12	0.70125	0.7	0.7	0.93	1.19	0.53	0.22	0.87	1.32	0.97	0.81	0.96	1.22	0.88	0.93	0.933	0.99	1.16	0.9
Mean ± SEM	1,00 ± 0,5	0,71 ± 0,1	0,93 ± 0,05	0,68± 0,04	0,96 ± 0,02	1,01 ± 0,08	0,83 ± 0,1	0,44 ± 0,1	1,01 ± 0,05	1,05 ± 0,05	0,94 ± 0,03	0,99 ± 0,1	1,01 ± 0,04	1,01 ± 0,10	0,98 ± 0,07	1,7 ± 0,09	1,01 ± 0,04	0,8976 ± 0,04	1,054 ± 0,07	0,6552 ± 0,08
Unpaired t test (two tailed)
P value		0.0158		0.0121		0.5722		0.0033		0.5642		0.5543		0.9247		0.4661		0.082		0.0034
P value summary		*		**		ns		**		ns		ns		ns		ns		ns		**
		Yes		Yes		No		Yes		No		No		No		No		No		Yes
t, df		t=2,700 df=16		t=3,669 df=16		t=0,5767 df=16		t=3,456 df=16		t=0,5888 df=16		t=0,6041 df=16		t=0,09596 df=16		t=0,7467 df=16		t=1,856 df=16		t=3,433 df=16
Source data for 4C
	Nppa		Nppb		Myh7		Acta1		Fgf2		Postn		Col1		Col3		Tgf		Ctgf
	Control	Sm-12/13-KO	Control	Sm-12/13-KO	Control	Sm-12/13-KO	Control	Sm-12/13-KO	Control	Sm-12/13-KO	Control	Sm-12/13-KO	Control	Sm-12/13-KO	Control	Sm-12/13-KO	Control	Sm-12/13-KO	Control	Sm-12/13-KO
	1	0.67	1	0.66	1	0.74	1	0.96	1	1.07	1.16	0.97	0.96	1.23	0.99	1.63	0.97	0.94	1	1.31
	0.76	0.69	0.96	0.67	1.1	1.24	0.98	0.63	0.99	0.99	1	0.57	1.15	1.88	1	2.27	0.92	1.38	1.12	1.04
	1.09	0.73	0.99	0.71	0.9	0.9	0.98	0.65	0.88	1.12	1.1	0.77	1	1.68	0.99	1.68	1.1	1.12	0.9	1.28
Mean ± SEM	0,95 ± 0,09	0,69 ± 0,01	0,98 ± 0,012	0,69 ± 0,012	1,00 ± 0,05	0,9630 ± 0,14	0,99 ± 0,01	0,75 ± 0,10	0,9567 ± 0,04	1,06 ± 0,03	1,08 ± 0,046	0,77 ± 0,11	1,04 ± 0,05	1,60 ± 0,19	0,99 ± 0,01	1,86 ± 0,20	0,99 ± 0,05	1,15 ± 0,12	1,01 ± 0,06	1,215 ± 0,08
Unpaired t test (two tailed)
P value		0.0634		0.0101		0.8265		0.0953		0.128		0.0637		0.0487		0.0135		0.3364		0.1177
P value summary		ns		*		ns		ns		ns		ns		*		*		ns		ns
Significantly different? (P < 0.05)		no		yes		No		No		No		No		Yes		Yes		No		No
t, df		t=2,548 df=4		t=16,88 df=4		t=0,2339 df=4		t=2,175 df=4		t=1,915 df=4		t=2,544 df=4		t=2,803 df=4		t=4,219 df=4		t=1,091 df=4		t=1,988 df=4
Source data for 4B
	Noradrenaline		Dopamine		Adrenaline		Angiotensin II		Aldosterone
	Control	Sm-12/13-KO	Control	Sm-12/13-KO	Control	Sm-12/13-KO	Control	Sm-12/13-KO	Control	Sm-12/13-KO
	43.3	38.9	2.91	3	13.6	13	80.4	74	329	748
	46.7	51.3	4.83	5	11	13.4	77.1	70	489	597
	49	46.6	2.46	3.1	8.2	8.5	89	74	332	428
	44.1	45.2	2.91	2.91	15.3	14.3	81	79	461.2	255
	40.4	37.57	2.72	3.36	16.5	15.8			352	435
	40.8				13.4	16
	34.8				14
					14.9228
Mean ± SEM	42,75 ± 1,7	43,91 ± 2,5	3,169 ± 0,42	3,474 ± 0,38	13,40 ± 0,93	13,53 ± 1,1	81,88 ± 2,5	74,25 ± 1,8	392,6 ± 34	492,6 ± 83
Unpaired t test (two tailed)
P value		0.7028		0.611		0.9306		0.0505		0.3008
P value summary		ns		ns		ns		ns		ns
Significantly different? (P < 0.05)		No		No		No		No		No
t, df		t=0,3926 df=10		t=0,5293 df=8		t=0,08890 df=12		t=2,439 df=6		t=1,106 df=8
Source data for 4D
	Noradrenaline		Dopamine		Adrenaline		Angiotensin II		Aldosterone
	Control	Sm-12/13-KO	Control	Sm-12/13-KO	Control	Sm-12/13-KO	Control	Sm-12/13-KO	Control	Sm-12/13-KO
	53	56	12	9	2.2	3.6	89	113	237.396	326.879
	56	84	13	14	1.8	4.4	93	107	461.202	255
	64	55	6	17	3	4.5	120	99	332	435
	88	49	8	8	5	3.5	125	104
			6.2	8.1
Mean ± SEM	65,25 ± 7,9	61,0 ± 7,8	9,04 ± 1,4	11,2 ± 1,8	3,0 ± 0,7	4,0 ± 0,3	106,8 ± 9,1	105,8 ± 3	343 ± 65	339 ± 52
Unpaired t test (two tailed)
P value		0.7159		0.3777		0.2353		0.9208		0.9589
P value summary		ns		ns		ns		ns		ns
Significantly different? (P < 0.05)		No		No		No		No		No
t, df		t=0,3816 df=6		t=0,9338 df=8		t=1,319 df=6		t=0,1037 df=6		t=0,05488 df=4
