# Supplementary material for: Myogenic vasoconstriction requires G12/G13 and LARG to maintain local and systemic vascular resistance
Source: eLife. 2019 Sep 24;8:e49374. doi: 10.7554/eLife.49374 (PMC6777979; doi:10.7554/eLife.49374)
Supplement: Figure 5—source data 1. [file elife-49374-fig5-data1.xlsx]

## Sheet: Sheet2
Source data for figure 5A (Left panel)
Systolic blood pressure (mmHg)
Hours	Control									Sm-12/13-KO								Sm-Larg-KO
-2	114	124.08	114	118.01	114	115	108.01	108		114.08	114.02	116	108.3	103	107.002	113		99	106	122.05	108.11	98	105	101	112
-1	108	119	112.06	120.2	118	109.05	107	106.03		109.04	110	117	109	101	104	114		98	107.01	110	114	99	104.001	102	106
0	111.64	115.01	112.08	119	120.55	93.86	112	114		107	108	116	110	97.09	99.83	112.42		102	108	109	105	98	107	113	85.45
1	75	126	106.02	101	134.64	109.2	113	124		109	77	105.486	109	109.18	108.4	92.11		94.64	95.93	113.77	91.45	96	113.38	108	83.5
2	128.43	122.6	127.858	125.858	116.75	97.09	116.75	97.55		112.023	87.8	106	113.023	111.29	104.11	74.17		97.27	103.27	82.18	90.5	90	92.33	103.22	88.25
3	118.353	110.753	120.5	118.5	97.82	97	110.4	97.09		114.247	127.24	102	114.247	108.91	99.1	69.36		99.58	104.92	92.1	86.64	77.5	87.4	96.27	87
4	114	113.436	119.522	121.522	86.64	90.7	114.55	100		108.455	125.06	99	109.455	105.75	86.82	71.75		97.17	111.18	92.08	90.27	63.58	82.18	88	67.83
5	110	128.16	115.74	117.74	89.4	86.3	112.55	97.3		131.24	115.728	98	121.24	97.83	79.58	75.18		90.82	106.8	89.27	88.25	63.83	82.91	82.18	73.36
6	105.91	126.307	109.454	111.454	107.09	74.11	110.82	99.73		103.273	104.01	96	113.273	90.82	75.33	84		86.7	98.36	86.7	96.09	70	85.58	75	77
7	106.077	117.451	101.28	101.28	97.6	84.73	114.89	99.82		95.5833	101.383	93	97.5833	89.58	71.58	79.43		83.73	91.67	84	92.44	83.5	85.67	70.67	67.5
8	99.5	109.952	96.1509	106.151	92.6	94.36	110.2	102.5		92.6667	104.833	92	93.6667	82.3	70.7	84.89		77.5	85.33	81.64	95.11	82	81.11	68.7	67.91
9	95.1743	104.771	94.25	104.25	94.5	99.82	103.22	104.82		88.5833	103.856	89	86.5833	80.55	66.45	48.18		73.64	80.27	80.45	92.4	80.44	79.56	74.27	78
10	89.1815	101.45	97.4738	97.4738	89.64	100.09	105.33	108.33		82.5203	99.2282	97.8813	83.5203	80.92	64.27	55.43		74.56	80.55	76.42	100.55	78.6	78.82	79	78.91
11	89.0167	98.0594	103.183	104.183	91.67	91.91	107.08	108.9		78.2727	92.9091	93.0909	76.2727	83.27	60.1	40.44		71.45	79.55	75	96	79.67	84.45	82.64	74.55
12	86.8	98.7	106.229	107.229	96.55	86.6	110.33	111.86		78.2172	91.0452	91.7147	74.2172	80.2	62.27	52.75		68.73	75.82	73	97.91	82	85.2	82.5	73.45
13	86.7	101.237	109.512	109.512	98.91	84.64	109.8	112.1		78.214	90.3	88.2	73.214	82.1	60.11	52.8		69.33	82.45	72.22	93.56	82.55	85.55	84.2	70.55
14	90.4728	106.755	117.4	118.4	99.64	88.55	120.08	111.91		77.9827	90.7	90.6968	75.9827	82.4	61.44	68		69.5	83.18	70.3	108.8	81.82	88.55	89.82	72.09
15	95.3556	107.5	117.2	118.2	97.33	80.6	116.6	110.09		77.3119	92.9147	93.5008	76.3119	84.45	61.45	55.5		76.45	85.08	73.13	99.17	83.4	89.73	90.78	71.45
16	97.7164	114.466	123.038	124.038	96.36	84.82	117.18	112.5		75.4143	89.656	90.9743	74.4143	86.18	60.82	47		69.83	91.67	72.1	95.55	85.56	92.42	92.15	68.17
17	98.2305	126.7	118	119	81.8	86.36	118.5	113.78		75.8	95.9	87.2667	74.8	88.08	61.1	51		70.64	90.73	72.17	96.36	82.08	92.9	93.38	58.08
18	94.088	122.684	121.704	121.704	93.18	93.36	122.4	117.89		76.1803	100.4	88.7432	75.1803	91.45	63.55	46.5		73.4	92.5	75.2	93.9	83.56	93.64	100.42	42.18
19	91	120.472	117.608	117.608	101.18	94.27	116.58	118.45		75.6	96.9351	94.1	73.6	95.3	63.36	50		78.73	97.67	77.82	91.4	84	94.83	100.25	40.8
20	90.2659	131.2	112.182	122.182	110	112.01	115.45	119.7		77.1747	97.402	88.3839	72.1747	85.01	55	45		74.82	100.91	79.55	95	82.27	95.5	96.89	37.44
21	90.1846	133.579	109.889	119.889	107	116.02	120.45	118.29		75.8889	95.6667	86.731	72.8889	84.04	54	47		73	90	80	103	83.25	94.56	102.38	38.17
22	90.0747	138.001	106.94	116.94	111	109.01	117.22	119.9		75.9954	102.501	89.4751	74.9954	83.03	63.1	47		72	89	81	94.86	78	91.62	102.33	39
23	97.2087	135.5	102.578	112.578	109.02	108	113.83	126.57		79.4	99	92.7541	78.4	82.01	64.01	46		71	89	82	85	79.92	99.43	101.83	38
24	98.9091	137.091	104.262	114.262	108.01	106	122.43	128		77.8182	103.904	89.8447	76.8182	80.01	65	45		69	89	83	84	83.17	98	102	37
										Two-way ANOVA		Control vs Sm-12/13-KO						Two-way ANOVA		Control vs Sm-Larg-KO
										Source of Variation	% of total variation	P value						Source of Variation	% of total variation	P value
										Interaction	10.99	< 0,0001						Interaction	4.4	0.0752
										Column Factor	28.66	< 0,0001						Column Factor	37.99	< 0,0001
										Row Factor	18.2	< 0,0001						Row Factor	13.37	< 0,0001
										Source of Variation	P value summary	Significant?						Source of Variation	P value summary	Significant?
										Interaction	****	Yes						Interaction	ns	No
										Column Factor	****	Yes						Column Factor	****	Yes
										Row Factor	****	Yes						Row Factor	****	Yes
										Source of Variation	Df	Sum-of-squares	Mean square	F				Source of Variation	Df	Sum-of-squares	Mean square	F
										Interaction	26	15793	607.4	3.414				Interaction	26	5588	214.9	1.446
										Column Factor	1	41208	41208	231.6				Column Factor	1	48239	48239	324.6
										Row Factor	26	26163	1006	5.655				Row Factor	26	16981	653.1	4.395
										Residual	351	62456	177.9					Residual	378	56172	148.6
										Number of missing values	81							Number of missing values	54
										Bonferroni multiple comparisons	Number of comparisons: 27							Bonferroni multiple comparisons	Number of comparisons: 27
										Row Factor	Control	Sm-12/13-KO	Difference	95% CI of diff,				Row Factor	Control	Sm-Larg-KO	Difference	95% CI of diff,
										-2	114.5	110	-4.5	-26,16 to 17,16				-2	114.5	106.8	-7.75	-26,86 to 11,36
										-1	114.4	110.7	-3.661	-25,32 to 18,00				-1	114.4	105.1	-9.25	-28,36 to 9,859
										0	112.4	109.1	-3.232	-24,89 to 18,42				0	112.4	105	-7.375	-26,48 to 11,73
										1	112.3	107.2	-5.065	-26,72 to 16,59				1	112.3	103.4	-8.825	-27,93 to 10,28
										2	111.1	101.5	-9.651	-31,31 to 12,00				2	111.1	99.58	-11.52	-30,63 to 7,588
										3	116.6	101.2	-15.41	-37,06 to 6,248				3	116.6	93.38	-23.23	-42,34 to -4,124
										4	108.8	105	-3.787	-25,44 to 17,87				4	108.8	91.43	-17.38	-36,49 to 1,733
										5	107.5	100.9	-6.647	-28,30 to 15,01				5	107.5	86.54	-21.01	-40,12 to -1,901
										6	107.1	102.7	-4.463	-26,12 to 17,19				6	107.1	84.68	-22.47	-41,58 to -3,362
										7	105.6	95.24	-10.37	-32,02 to 11,29				7	105.6	84.43	-21.18	-40,29 to -2,071
										8	102.9	89.73	-13.16	-34,81 to 8,499				8	102.9	82.4	-20.49	-39,60 to -1,384
										9	101.4	88.72	-12.7	-34,36 to 8,952				9	101.4	79.91	-21.51	-40,62 to -2,405
										10	100.1	80.46	-19.64	-41,30 to 2,013				10	100.1	79.88	-20.22	-39,33 to -1,113
										11	98.62	80.54	-18.08	-39,74 to 3,574				11	98.62	80.93	-17.69	-36,80 to 1,414
										12	99.25	74.91	-24.34	-46,00 to -2,686				12	99.25	80.41	-18.84	-37,95 to 0,2727
										13	100.5	75.77	-24.76	-46,42 to -3,108				13	100.5	79.83	-20.71	-39,82 to -1,602
										14	101.6	74.99	-26.56	-48,22 to -4,904				14	101.6	80.05	-21.5	-40,61 to -2,391
										15	106.7	78.17	-28.48	-50,14 to -6,823				15	106.7	83.01	-23.64	-42,75 to -4,534
										16	105.4	77.35	-28.01	-49,67 to -6,355				16	105.4	83.65	-21.71	-40,82 to -2,601
										17	108.8	74.92	-33.84	-55,50 to -12,19				17	108.8	83.43	-25.33	-44,44 to -6,224
										18	107.8	76.28	-31.52	-53,17 to -9,862				18	107.8	82.04	-25.75	-44,86 to -6,645
										19	110.9	77.43	-33.45	-55,10 to -11,79				19	110.9	81.85	-29.03	-48,14 to -9,917
										20	109.6	78.41	-31.23	-52,89 to -9,576				20	109.6	83.19	-26.46	-45,57 to -7,349
										21	114.1	74.31	-39.82	-61,47 to -18,16				21	114.1	82.8	-31.33	-50,43 to -12,22
										22	114.4	73.74	-40.67	-62,33 to -19,01				22	114.4	83.05	-31.37	-50,47 to -12,26
										23	113.6	76.57	-37.07	-58,72 to -15,41				23	113.6	80.98	-32.66	-51,77 to -13,55
										24	113.2	77.36	-35.79	-57,45 to -14,14				24	113.2	80.77	-32.39	-51,49 to -13,28
										Row Factor	Difference	t	P value	Summary				Row Factor	Difference	t	P value	Summary
										-2	-4.5	0.6518	P > 0,05	ns				-2	-7.75	1.272	P > 0,05	ns
										-1	-3.661	0.5303	P > 0,05	ns				-1	-9.25	1.518	P > 0,05	ns
										0	-3.232	0.4682	P > 0,05	ns				0	-7.375	1.21	P > 0,05	ns
										1	-5.065	0.7336	P > 0,05	ns				1	-8.825	1.448	P > 0,05	ns
										2	-9.651	1.398	P > 0,05	ns				2	-11.52	1.89	P > 0,05	ns
										3	-15.41	2.232	P > 0,05	ns				3	-23.23	3.812	P < 0,01	**
										4	-3.787	0.5486	P > 0,05	ns				4	-17.38	2.851	P > 0,05	ns
										5	-6.647	0.9629	P > 0,05	ns				5	-21.01	3.447	P < 0,05	*
										6	-4.463	0.6465	P > 0,05	ns				6	-22.47	3.687	P < 0,01	**
										7	-10.37	1.501	P > 0,05	ns				7	-21.18	3.475	P < 0,05	*
										8	-13.16	1.906	P > 0,05	ns				8	-20.49	3.362	P < 0,05	*
										9	-12.7	1.84	P > 0,05	ns				9	-21.51	3.53	P < 0,05	*
										10	-19.64	2.845	P > 0,05	ns				10	-20.22	3.318	P < 0,05	*
										11	-18.08	2.619	P > 0,05	ns				11	-17.69	2.903	P > 0,05	ns
										12	-24.34	3.526	P < 0,05	*				12	-18.84	3.09	P > 0,05	ns
										13	-24.76	3.587	P < 0,05	*				13	-20.71	3.398	P < 0,05	*
										14	-26.56	3.847	P < 0,01	**				14	-21.5	3.527	P < 0,05	*
										15	-28.48	4.125	P < 0,01	**				15	-23.64	3.879	P < 0,01	**
										16	-28.01	4.057	P < 0,01	**				16	-21.71	3.562	P < 0,05	*
										17	-33.84	4.902	P < 0,0001	****				17	-25.33	4.156	P < 0,01	**
										18	-31.52	4.565	P < 0,001	***				18	-25.75	4.225	P < 0,001	***
										19	-33.45	4.845	P < 0,0001	****				19	-29.03	4.762	P < 0,0001	****
										20	-31.23	4.524	P < 0,001	***				20	-26.46	4.341	P < 0,001	***
										21	-39.82	5.768	P < 0,0001	****				21	-31.33	5.139	P < 0,0001	****
										22	-40.67	5.891	P < 0,0001	****				22	-31.37	5.146	P < 0,0001	****
										23	-37.07	5.369	P < 0,0001	****				23	-32.66	5.358	P < 0,0001	****
										24	-35.79	5.185	P < 0,0001	****				24	-32.39	5.313	P < 0,0001	****
Source data for Figure 5A (Right panel, bar graphs)
	Control	Sm-G12/13-KO	Sm-Larg-KO
	92.347	77.4527	72.1627
	118.226	95.8974	87.8073
	111.147	90.8905	76.194
	114.88	75.5194	95.6707
	99.4173	84.5567	81.99
	96.1467	61.298	91.0133
	115.551	49.9613	93.3713
	115.885		55.9893
Mean ± SEM	107,9 ± 3,6	76,51 ± 6	81,77 ± 4,7
P value		0.0006	0.0006
P value summary		***	***
Significantly different? (P < 0.05)		Yes	Yes
t, df		t=4,542 df=13	t=4,404 df=14
Source data for figure 5B (Left panel)
Diastolic blood pressure (mmHg)
Hours	Control									Sm-12/13-KO								Sm-Larg-KO
-2	72	76	68	74	95.67	85.89	99	93.83		90	89.5	73.64	83	79	85	78		82.45	84	69.22	84	75	77	78	77
-1	82.18	87	67	78	92	84.64	102.45	95.67		88	87.7	74.91	69	73	87	81		76.56	85	74.8	82.3	73.67	82.64	69.71	83.1
0	82.43	86	68	87	91.4	83	99	92		85	108.2	70.5	76	79	91	81		83.2	86	74.5	83.91	67.9	84.55	55.92	77
1	82.55	86.72	67.4	87.53	77.64	68.64	99.67	91.4		74.86	67.45	53.44	77.3678	79.7674	91.6875	63.09		80.9	65.5	66.57	89.13	74.55	92.3	75.33	71.11
2	76.2857	97.1	69.6	91.11	77.91	76.75	81.18	93.57		78.5	67.55	55	80.6	78.44	107.4	48.18		77.42	64.45	58.27	74.18	77.17	90.91	75.27	83.33
3	77.89	89.7	75.09	89.73	79.42	77	72.45	89.73		43	57.6	54.91	87.55	109.42	95.6	64.89		73.73	69.5	49.25	71	78.36	85.4	75.45	75.92
4	85.08	87.83	84.7	84.8	77.7	75.67	77.3	93.4		50.36	53.89	58.27	97.33	97.25	87.91	67.64		69	70.55	49.42	69.09	77.91	78.36	72.64	77.82
5	86.5455	82.64	92.73	84.9	78.27	74.67	97.09	92.33		34.25	54.2	56.17	87.89	87.64	97.09	70.27		61.75	61.6	55.73	71.08	74.73	70.55	67.9	73.33
6	92.75	111.5	87.55	80.3	78	66	85.4	90.1		46	58.8	56.33	82.17	83.6	88.25	69.17		58.92	67	66.8	72.92	70.63	64	60	68
7	91	80.73	83.22	77	80	75.17	80.33	92		49.33	71.13	57.17	75.6667	80.5	96.6364	63.45		57.13	68.9	63.27	71.44	67.5	62.25	54.78	62.92
8	88	81.63	90.13	72.3	81	83.1	81.58	83.5		60	83.11	55.64	72.67	80	89.09	59.27		60.55	53.73	60.56	66.1	61.55	58.67	52.55	59.5
9	87	75.8	70.3	72.88	82.09	83.9	74.64	77.78		48	84.73	54.75	66.33	75.7	82.75	56.5		63.73	63.33	59.11	62.67	59.56	56.69	48.73	57.45
10	85	72.56	63.36	73.6	83	81.78	77.55	78.2		42	84.64	56.27	59.6	68.1	76	52		66.56	66.18	60.3	61.27	55.82	62.64	45.36	53.44
11	80.08	70.13	63.5	75	84.6	71.91	81.3	80.7		46	86.67	55.82	54.0909	61.4444	69.5455	50.42		65.27	62.1	60	63.45	54	65.55	46.75	49.92
12	79	67.17	62.18	77.25	82.83	65.63	82.92	83.18		44	82.22	55.4	52.67	56.58	67.1	47.77		66.25	55.73	58.83	63.33	53.43	67.33	46.82	44.33
13	75	66.33	64.73	79.3	82.42	63.56	84.75	82.58		43	81.75	55.6	50.22	54.36	63.91	46.8		71.18	55.7	57.75	62.2	56.36	72.1	52.89	46.22
14	74	68.67	67	82.91	82.75	68	81	89.44		41.5	86.89	55.75	49.82	54.83	66.18	48.7		71.75	50.58	59.6	62.83	55.73	72.55	47.64	44.18
15	75	68.58	69.64	81.7	83.5	59.36	79.82	87.5		39	85.33	58.3	48.17	54.18	65.67	48		72.92	56.67	60.1	63.82	56.2	72.75	47.92	44.2
16	77	71.7	79	84	83.91	63.89	68.73	87.42		39	77.18	58.67	45.9	55.64	64.6	48.33		71.8	57.82	57.67	64.23	59.36	77	49.5	44.3
17	78	70.27	76.1	85	86.18	64.8	58.73	88.64		38	83.27	59.5	47.1	67.18	63.55	52.45		77.42	53.9	59.73	65.55	61.91	79.91	54.7	42.2
18	76	68.18	77.89	82.55	86.18	68.92	83.45	93.11		39	81.27	64.9	47.3	62.67	67.2	50.17		75.38	45.36	60.67	64.1	62.55	83.63	48.5	42.55
19	74	67.73	83.64	77.33	87.91	68.91	83.29	88.78		41	81.18	59.29	48.55	62.9	61.17	52		76	31.67	57.42	65.6	64	83.64	52.11	43.56
20	73	63.17	91.25	73.36	87.4	72.5	76.64	85.9		42	78.1	58	45.27	65.64	62.13	55		75.2	28.91	59.58	67.45	67.33	81.45	48	44.27
21	71	66.58	89.55	69.33	89.58	70.82	71.55	88.8		42	82.38	58	48.55	66.17	64.83	55.25		78.5	27.67	55.3	68.45	69	84.8	50.88	43.57
22	72	69.13	90.45	67.73	92.71	77.64	77	86.8		42	74	58	46.6	70.67	62	60.92		77	28.18	57.73	63	72.67	86.1	55.5	47.44
23	78	71.4	94	66.83	91	78.22	87.82	83.3		42	72	56	47.22	70.33	68.3	63.75		76	28	60.33	72.57	74.78	87.18	60.09	48.92
24	72	70	96.82	65.91	91	77.18	91	90		42	71	57	52.6	74.42	73.78	67.88		74	32	57	73	77.73	87	55.25	55.11
										Two-way ANOVA		Control vs Sm-12/13-KO						Two-way ANOVA		Control vs Sm-Larg-KO
										Two-way ANOVA								Two-way ANOVA
										Source of Variation	% of total variation	P value						Source of Variation	% of total variation	P value
										Interaction	3.82	0.6122						Interaction	3.16	0.598
										Column Factor	24.23	< 0,0001						Column Factor	32.69	< 0,0001
										Row Factor	15.25	< 0,0001						Row Factor	13.54	< 0,0001
										Source of Variation	P value summary	Significant?						Source of Variation	P value summary	Significant?
										Interaction	ns	No						Interaction	ns	No
										Column Factor	****	Yes						Column Factor	****	Yes
										Row Factor	****	Yes						Row Factor	****	Yes
										Source of Variation	Df	Sum-of-squares	Mean square	F				Source of Variation	Df	Sum-of-squares	Mean square	F
										Interaction	26	3395	130.6	0.8979				Interaction	26	2551	98.11	0.9078
										Column Factor	1	21518	21518	148				Column Factor	1	26385	26385	244.1
										Row Factor	26	13543	520.9	3.582				Row Factor	26	10929	420.3	3.89
										Residual	351	51045	145.4					Residual	378	40851	108.1
										Number of missing values	189							Number of missing values	162
										Bonferroni multiple comparisons	Number of comparisons: 27							Bonferroni multiple comparisons	Number of comparisons: 27
										Control vs Sm-12/13-KO								Control vs Sm-Larg-KO
										Row Factor	Control	Sm-12/13-KO	Difference	95% CI of diff,				Row Factor	Control	Sm-Larg-KO	Difference	95% CI of diff,
										-2	83.05	82.59	-0.4573	-20,04 to 19,12				-2	83.05	78.33	-4.715	-21,01 to 11,58
										-1	86.12	80.09	-6.03	-25,61 to 13,55				-1	86.12	78.47	-7.645	-23,94 to 8,651
										0	86.1	84.39	-1.718	-21,30 to 17,86				0	86.1	76.62	-9.481	-25,78 to 6,815
										1	82.69	72.52	-10.17	-29,75 to 9,408				1	82.69	76.92	-5.77	-22,07 to 10,53
										2	82.94	73.67	-9.271	-28,85 to 10,31				2	82.94	75.13	-7.813	-24,11 to 8,483
										3	81.38	73.28	-8.095	-27,67 to 11,48				3	81.38	72.33	-9.05	-25,35 to 7,246
										4	83.31	73.24	-10.07	-29,65 to 9,504				4	83.31	70.6	-12.71	-29,01 to 3,585
										5	86.15	69.64	-16.5	-36,08 to 3,075				5	86.15	67.08	-19.06	-35,36 to -2,767
										6	86.45	69.19	-17.26	-36,84 to 2,317				6	86.45	66.03	-20.42	-36,71 to -4,120
										7	82.43	70.55	-11.88	-31,45 to 7,702				7	82.43	63.52	-18.91	-35,20 to -2,611
										8	82.66	71.4	-11.26	-30,84 to 8,320				8	82.66	59.15	-23.5	-39,80 to -7,208
										9	78.05	66.97	-11.08	-30,66 to 8,495				9	78.05	58.91	-19.14	-35,44 to -2,844
										10	76.88	62.66	-14.22	-33,80 to 5,355				10	76.88	58.95	-17.94	-34,23 to -1,639
										11	75.9	60.57	-15.33	-34,91 to 4,246				11	75.9	58.38	-17.52	-33,82 to -1,226
										12	75.02	57.96	-17.06	-36,64 to 2,521				12	75.02	57.01	-18.01	-34,31 to -1,718
										13	74.83	56.52	-18.31	-37,89 to 1,264				13	74.83	59.3	-15.53	-31,83 to 0,7624
										14	76.72	57.67	-19.05	-38,63 to 0,5240				14	76.72	58.11	-18.61	-34,91 to -2,318
										15	75.64	56.95	-18.69	-38,27 to 0,8907				15	75.64	59.32	-16.31	-32,61 to -0,01880
										16	76.96	55.62	-21.34	-40,92 to -1,761				16	76.96	60.21	-16.75	-33,04 to -0,4501
										17	75.97	58.72	-17.24	-36,82 to 2,335				17	75.97	61.92	-14.05	-30,35 to 2,246
										18	79.54	58.93	-20.61	-40,18 to -1,027				18	79.54	60.34	-19.19	-35,49 to -2,896
										19	78.95	58.01	-20.94	-40,51 to -1,358				19	78.95	59.25	-19.7	-35,99 to -3,403
										20	77.9	58.02	-19.88	-39,46 to -0,3044				20	77.9	59.02	-18.88	-35,17 to -2,583
										21	77.15	59.6	-17.55	-37,13 to 2,024				21	77.15	59.77	-17.38	-33,68 to -1,084
										22	79.18	59.17	-20.01	-39,59 to -0,4343				22	79.18	60.95	-18.23	-34,53 to -1,934
										23	81.32	59.94	-21.38	-40,96 to -1,800				23	81.32	63.48	-17.84	-34,13 to -1,541
										24	81.74	62.67	-19.07	-38,65 to 0,5080				24	81.74	63.89	-17.85	-34,15 to -1,556
										Row Factor	Difference	t	P value	Summary				Row Factor	Difference	t	P value	Summary
										-2	-0.4573	0.07327	P > 0,05	ns				-2	-4.715	0.9071	P > 0,05	ns
										-1	-6.03	0.9662	P > 0,05	ns				-1	-7.645	1.471	P > 0,05	ns
										0	-1.718	0.2753	P > 0,05	ns				0	-9.481	1.824	P > 0,05	ns
										1	-10.17	1.63	P > 0,05	ns				1	-5.77	1.11	P > 0,05	ns
										2	-9.271	1.485	P > 0,05	ns				2	-7.813	1.503	P > 0,05	ns
										3	-8.095	1.297	P > 0,05	ns				3	-9.05	1.741	P > 0,05	ns
										4	-10.07	1.614	P > 0,05	ns				4	-12.71	2.445	P > 0,05	ns
										5	-16.5	2.644	P > 0,05	ns				5	-19.06	3.667	P < 0,01	**
										6	-17.26	2.766	P > 0,05	ns				6	-20.42	3.928	P < 0,01	**
										7	-11.88	1.903	P > 0,05	ns				7	-18.91	3.638	P < 0,01	**
										8	-11.26	1.804	P > 0,05	ns				8	-23.5	4.522	P < 0,001	***
										9	-11.08	1.776	P > 0,05	ns				9	-19.14	3.682	P < 0,01	**
										10	-14.22	2.279	P > 0,05	ns				10	-17.94	3.45	P < 0,05	*
										11	-15.33	2.457	P > 0,05	ns				11	-17.52	3.371	P < 0,05	*
										12	-17.06	2.733	P > 0,05	ns				12	-18.01	3.466	P < 0,05	*
										13	-18.31	2.934	P > 0,05	ns				13	-15.53	2.988	P > 0,05	ns
										14	-19.05	3.053	P > 0,05	ns				14	-18.61	3.581	P < 0,05	*
										15	-18.69	2.994	P > 0,05	ns				15	-16.31	3.139	P < 0,05	*
										16	-21.34	3.419	P < 0,05	*				16	-16.75	3.222	P < 0,05	*
										17	-17.24	2.763	P > 0,05	ns				17	-14.05	2.703	P > 0,05	ns
										18	-20.61	3.301	P < 0,05	*				18	-19.19	3.692	P < 0,01	**
										19	-20.94	3.354	P < 0,05	*				19	-19.7	3.79	P < 0,01	**
										20	-19.88	3.186	P < 0,05	*				20	-18.88	3.632	P < 0,01	**
										21	-17.55	2.813	P > 0,05	ns				21	-17.38	3.344	P < 0,05	*
										22	-20.01	3.206	P < 0,05	*				22	-18.23	3.507	P < 0,05	*
										23	-21.38	3.425	P < 0,05	*				23	-17.84	3.432	P < 0,05	*
										24	-19.07	3.055	P > 0,05	ns				24	-17.85	3.435	P < 0,05	*
Source data for Figure 5B (Right panel, bar graphs)
	Control	Sm-12/13-KO	Sm-Larg-KO
	75.9387	41.5	45.3647
	68.7733	80.5253	58.8007
	77.9407	57.7667	65.39
	76.12	49.5774	62.7247
	86.3313	63.0076	77.5753
	70.208	66.3977	50.794
	79.0367	53.296	46.2807
	86.29		73.0153
Mean ± SEM	77,58 ± 2,281	58,87 ± 4,7	59,99 ± 4
Unpaiired t-test (two tailed)
P value		0.0028	0.0026
P value summary		**	**
Significantly different? (P < 0.05)		Yes	Yes
t, df		t=3,681 df=13	t=3,657 df=14
