# Supplementary material for: Myogenic vasoconstriction requires G12/G13 and LARG to maintain local and systemic vascular resistance
Source: eLife journal article supplement (doi:10.7554/elife.49374), 2019-09-24

Source data for Figure 1G

P-Mypt1 (10% SDS-PAGE)

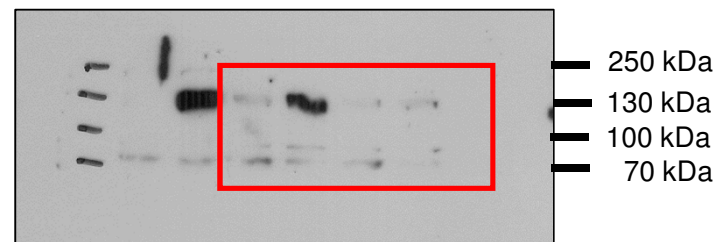

Total Mypt1(10% SDS-PAGE)

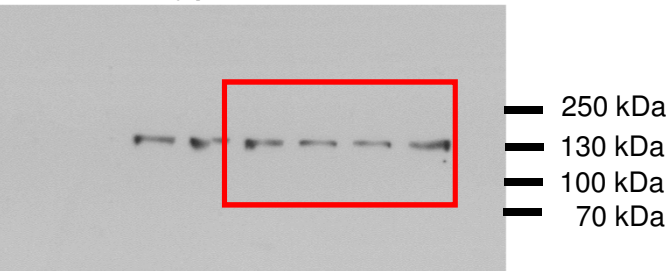

GAPDH (10% SDS-PAGE)

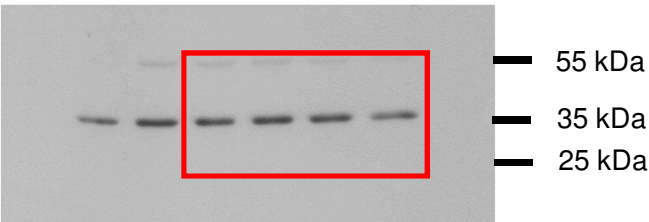

Supplement: supp [file elife-49374-supp-v1.zip]
